# Supplementary material for: Geschlechtersensible Prävention und Gesundheitsförderung für Kinder: Chancen und Herausforderungen bei der Umsetzbarkeit
Source: Springer Nature journal article supplement (doi:10.1007/s11553-022-01006-3), 2022-12-29
Supplement: MOESM1 [file 23865502]

| Oberkategorie    | Subkategorie 1. Ebene                                                                                                                                                                        | Subkategorie 2. Ebene                                                                                                                                                                                                                                         |
|------------------|----------------------------------------------------------------------------------------------------------------------------------------------------------------------------------------------|---------------------------------------------------------------------------------------------------------------------------------------------------------------------------------------------------------------------------------------------------------------|
| Modell allgemein | <p>Modellverständnis / Umsetzbarkeit<br/>Verbesserungsvorschläge am Modell</p> <p>gesellschaftlicher Kontext</p> <p>kultureller / religiöser Kontext<br/>Sprache<br/>systemischer Ansatz</p> | <p>gesellschaftliche Entwicklung des Rollenbildes<br/>gesellschaftliche Entwicklung von Werten und Normen<br/>fehlende Anerkennung für soziale Berufe<br/>Wirtschaftszweig Geschlechtertypisierung</p>                                                        |
| Ressourcen       | <p>rechtliche / politische Rahmenbedingungen<br/>finanzielle Ressourcen<br/>personelle Ressourcen<br/>kompetenzbasierte Ressourcen</p>                                                       | Schutzkonzepte                                                                                                                                                                                                                                                |
| Setting          | <p>Diskrepanzen zwischen Rollenbildern verschiedener Settings<br/>Vielfalt in der Stellenbesetzung<br/>Settingübergreifende Zusammenarbeit<br/>Querschnittsthema</p>                         |                                                                                                                                                                                                                                                               |
| Qualifizierung   | <p>Haltung<br/>Vorbildfunktion<br/>(Selbst-) Reflexion<br/>Elternarbeit<br/>Ausbildung / Schulung / Fortbildung</p>                                                                          |                                                                                                                                                                                                                                                               |
| Partizipation    | <p>Art und Weise<br/>Bezugspersonen-Vielfalt</p>                                                                                                                                             | <p>Eltern<br/>Kinder</p>                                                                                                                                                                                                                                      |
| Individuum       | <p>Methoden</p> <p>Konzepte / Ansätze</p>                                                                                                                                                    | <p>Lernen durch Nachahmen<br/>Selbsterfahrung<br/>Persönlichkeitsstärkung<br/>Bücher und (Lehr-) Materialien<br/>Lebenslaufperspektive<br/>Dramatisierung und Entdramatisierung<br/>individuelle Bedürfnisse<br/>weitere Konzepte / Maßnahmen / Programme</p> |
